# Supplementary material
Source: PubMed Central journal article supplement (PMC2904098)
Supplement: 00427.2009_1.pdf [file 00427.2009_1.pdf]

**Supplemental Table 1.** Primers and probes for real time RT-PCR

| <u>Gene</u> | <u>ABI*</u><br><u>Catalog #</u> | <u>Amplicon</u><br><u>length</u><br>(bp) | <u>Context sequence (of probe)</u> | <u>Exons</u> |
|-------------|---------------------------------|------------------------------------------|------------------------------------|--------------|
| 18S         | Hs99999901_s1                   | 187                                      | TCCATTGGAGGGCAAGTCTGGTGCC          |              |
| SP-A        | Hs00831305_s1                   | 164                                      | AGCCCCCTGACCTGAAGACAGCCAG          | 5            |
| SP-B        | Hs00167036_m1                   | 100                                      | GATTCCCAAGGGTGCGCTAGCTGTG          | 6-8          |
| SP-C        | Hs00161628_m1                   | 73                                       | AGAGCCCGCCGGACTACTCCGCAGC          | 4, 5         |
| TTF-1       | Hs00163037_m1                   | 96                                       | CCGCCATCTCCCGCTTCATGGGCCC          | 2, 3         |
| CEBPd       | Hs00270931_s1                   | 107                                      | TGGCGCAGCCAGAGCCGCCGGGTGC          | 1            |
| PGC         | Hs00160052_m1                   | 83                                       | AGCAGTGGTCAAAGTGCCCCTGAAG          | 1, 2         |
| DC-LAMP     | Hs00180880_m1                   | 72                                       | TTTGAAATGTGGATGAGTGCTCGT           | 5, 6         |
| ABCA3       | Hs00184543_m1                   | 77                                       | GAAGTCTTCCTTCGGGTCGGGAAGC          | 17-19        |
| DUOX1       | Hs00213694_m1                   | 87                                       | TCTGTGTCAAAGGGGTGGAGGTGCC          | 19-23        |
| ADFP        | Hs00605340_m1                   | 139                                      | TACTGTTCACCTGATTGAATTTGCC          | 6, 7         |
| CEACAM6     | Hs00366002_m1                   | 80                                       | CAGGAAGACTGGCAGATTGGACCAG          | 5, 6         |

\* TAQMAN Gene Expression Assay primer sets from Applied Biosystems, Inc.  
All primers are inventoried sets.

**Supplemental Table 2.** Genes expressed  $\geq 10$ -fold higher in adult versus fetal type II cells

| <u>Gene Title</u>                                     | <u>Gene Symbol</u> | <u>mRNA Abundance</u> |                    | <u>GO Biological Response /Molecular Function</u> |
|-------------------------------------------------------|--------------------|-----------------------|--------------------|---------------------------------------------------|
|                                                       |                    | <u>Adult (f.u.)</u>   | <u>Fetal/Adult</u> |                                                   |
| secretoglobin, family 1A, member 1 (uteroglobin)      | SCGB1A1            | 10924                 | 0.002              | signal transduction/cytokine activity             |
| chemokine (C-X-C motif) ligand 2                      | CXCL2              | 9035                  | 0.03               | chemotaxis                                        |
| secretory leukocyte peptidase inhibitor               | SLPI               | 8190                  | 0.06               | ---                                               |
| interleukin 8                                         | IL8                | 6491                  | 0.02               | angiogenesis/cytokine activity                    |
| heat shock 70kDa protein 1A / 1B                      | HSPA1A /B          | 5492                  | 0.10               | protein folding                                   |
| chemokine (C-C motif) ligand 20                       | CCL20              | 4833                  | 0.004              | chemotaxis/chemokine activity                     |
| superoxide dismutase 2, mitochondrial                 | SOD2               | 3805                  | 0.02               | response to superoxide                            |
| chemokine (C-X-C motif) ligand 1                      | CXCL1              | 3694                  | 0.02               | chemotaxis/chemokine activity                     |
| S100 calcium binding protein A8                       | S100A8             | 3167                  | 0.01               | inflammatory response/Ca ion binding              |
| surfactant, pulmonary-associated protein D            | SFTPD              | 2759                  | 0.06               | Regulate cytokine production/Ca ion binding       |
| chemokine (C-C motif) ligand 2                        | CCL2               | 2674                  | 0.09               | protein aa phosphorylation/chemokine activity     |
| heat shock 70kDa protein 6 (HSP70B')                  | HSPA6              | 2647                  | 0.01               | protein folding                                   |
| lipocalin 2 (oncogene 24p3)                           | LCN2               | 2456                  | 0.01               | transport                                         |
| peptidase inhibitor 3, skin-derived (SKALP)           | PI3                | 2430                  | 0.01               | /endopeptidase inhibitor activity                 |
| S100 calcium binding protein A2                       | S100A2             | 2355                  | 0.09               | calcium ion binding                               |
| ribosomal protein S4, Y-linked 1                      | RPS4Y1             | 2216                  | 0.01               | protein biosynthesis/RNA binding                  |
| hypothetical protein MGC5618                          | MGC5618            | 2059                  | 0.05               | ---                                               |
| proteoglycan 1, secretory granule                     | PRG1               | 2057                  | 0.01               | ---                                               |
| tumor necrosis factor, alpha-induced protein 3        | TNFAIP3            | 2054                  | 0.09               | ubiquitin cycle/DNA binding                       |
| serine peptidase inhibitor, Kazal type 1              | SPINK1             | 1793                  | 0.06               | serine-type endopeptidase inhibitor activity      |
| Major histocompatibility complex, class II, DR beta 3 | HLA-DRB5           | 1792                  | 0.03               | immune response                                   |
| chemokine (C-X-C motif) ligand 3                      | CXCL3              | 1791                  | 0.02               | chemotaxis/chemokine activity                     |
| CD74 antigen                                          | CD74               | 1449                  | 0.07               | prostaglandin biosynthesis/cytokine binding       |
| v-fos FBJ murine osteosarcoma viral oncogene homolog  | FOS                | 1436                  | 0.05               | DNA methylation/ DNA binding                      |
| interleukin 1 receptor antagonist                     | IL1RN              | 1417                  | 0.01               | inflammatory response                             |
| defensin, beta 4                                      | DEFB4              | 1347                  | 0.01               | chemotaxis                                        |
| chemokine (C-X-C motif) ligand 5                      | CXCL5              | 1278                  | 0.03               | chemotaxis/chemokine activity                     |
| major histocompatibility complex, class II, DR beta 1 | HLA-DRB1           | 1264                  | 0.02               | immune response                                   |
| S100 calcium binding protein A9                       | S100A9             | 1234                  | 0.02               | inflammatory response/signal transduction         |
| cytochrome P450, family 4 B, polypeptide 1            | CYP4B1             | 1210                  | 0.04               | electron transport/monooxygenase activity         |
| chromosome 8 open reading frame 4                     | C8orf4             | 1209                  | 0.06               | ---                                               |

|                                                                                                         |                             |             |              |                                                              |
|---------------------------------------------------------------------------------------------------------|-----------------------------|-------------|--------------|--------------------------------------------------------------|
| complement component 4 binding protein, alpha                                                           | C4BPA                       | 1152        | 0.02         | immune response                                              |
| stratifin                                                                                               | SFN                         | 1152        | 0.02         | cell cycle/PKC inhibitor activity                            |
| v-yes-1 Yamaguchi sarcoma viral related oncogene homolog                                                | LYN                         | 1086        | 0.08         | protein aa phosphorylation/nucleotide binding                |
| carcinoembryonic antigen-related cell adhesion molecule 5                                               | CEACAM5                     | 1020        | 0.10         | ---                                                          |
| BCL2-related protein A1                                                                                 | BCL2A1                      | 1012        | 0.02         | anti-apoptosis                                               |
| immunoglobulin heavy constant alpha 1 /A2/ MGC27165                                                     | IGHA1 /A2 /MGC27165         | 1001        | 0.02         | immune response/antigen binding                              |
| palate, lung and nasal epithelium carcinoma associated matrix metalloproteinase 7 (matrilysin, uterine) | PLUNC<br>MMP7<br>CCL3/3L1/3 | 1000<br>979 | 0.02<br>0.02 | innate immune response/lipid binding<br>proteolysis          |
| chemokine (C-C motif) ligand 3                                                                          | L3                          | 965         | 0.02         | inflammatory response/signal transduction                    |
| PDZK1 interacting protein 1                                                                             | PDZK1IP1                    | 941         | 0.02         | ---                                                          |
| tumor necrosis factor (ligand) superfamily 10                                                           | TNFSF10                     | 937         | 0.04         | apoptosis/signal transducer activity                         |
| tryptase beta 2                                                                                         | TPSB2                       | 936         | 0.02         | proteolysis/ endopeptidase activity                          |
| arachidonate 5-lipoxygenase-activating protein                                                          | ALOX5AP                     | 934         | 0.02         | inflammatory response/enzyme activator                       |
| serpin peptidase inhibitor, clade B 2 major histocompatibility complex, class II, DR alpha              | SERPINB2                    | 918         | 0.02         | anti-apoptosis/ endopeptidase inhibitor                      |
| interleukin 1, beta                                                                                     | HLA-DRA<br>IL1B             | 912<br>893  | 0.02<br>0.03 | immune response<br>inflammatory response/signal transduction |
| aldo-keto reductase family 1, C3 chromosome 10 open reading frame 116                                   | AKR1C3<br>C10orf116         | 840<br>833  | 0.03<br>0.02 | lipid metabolism/transporter activity<br>---                 |
| Ras-related associated with diabetes                                                                    | RRAD                        | 828         | 0.02         | small GTPase mediated signal transduction                    |
| regulator of G-protein signalling 1                                                                     | RGS1                        | 812         | 0.02         | immune response/signal transduction                          |
| FBJ murine osteosarcoma viral oncogene homolog B                                                        | FOSB                        | 794         | 0.03         | regulation of progression through cell cycle                 |
| CD83 antigen                                                                                            | CD83                        | 775         | 0.03         | humoral immune response                                      |
| hemoglobin, alpha 2                                                                                     | HBA2                        | 775         | 0.03         | transport/oxygen transporter activity                        |
| chemokine (C-X-C motif) ligand 6                                                                        | CXCL6                       | 759         | 0.03         | inflammatory response/cytokine activity                      |
| tryptase alpha/beta 1                                                                                   | TPSAB1                      | 725         | 0.03         | defense response/endopeptidase activity                      |
| lactotransferrin                                                                                        | LTF                         | 716         | 0.03         | iron ion transport/endopeptidase activity                    |
| immunoglobulin kappa constant /kappa variable 1-5                                                       | IGKC /V1-5                  | 714         | 0.03         | immune response/antigen binding                              |
| chemokine (C-C motif) ligand 4                                                                          | CCL4                        | 684         | 0.03         | inflammatory response/chemokine activity                     |
| aquaporin 9                                                                                             | AQP9                        | 683         | 0.03         | water transport                                              |
| lysosomal associated multispinning membrane protein 5                                                   | LAPTM5                      | 667         | 0.04         | ---                                                          |
| G protein-coupled receptor 109B                                                                         | GPR109B                     | 658         | 0.03         | G-protein coupled signaling pathway                          |
| Rho GDP dissociation inhibitor (GDI) beta                                                               | ARHGDI3                     | 642         | 0.03         | immune response                                              |
| interleukin 6 (interferon, beta 2)                                                                      | IL6                         | 622         | 0.09         | acute-phase response                                         |
| C-type lectin domain family 2, B                                                                        | CLEC2B                      | 616         | 0.09         | antimicrobial humoral response                               |
| immunoglobulin lambda locus                                                                             | IGL@                        | 610         | 0.03         | immune response/antigen binding                              |

| /Mcg/Kern-Oz/variable 3-25 / 2-14                                         | /C1/C2/V3-25/V2-14 |     |      |                                              |  |
|---------------------------------------------------------------------------|--------------------|-----|------|----------------------------------------------|--|
| CD53 antigen                                                              | CD53               | 590 | 0.10 | antimicrobial humoral response               |  |
| carboxypeptidase A3                                                       | CPA3               | 584 | 0.03 | proteolysis                                  |  |
| haptoglobin //haptoglobin-related protein                                 | HP / HPR           | 582 | 0.03 | defense response/ endopeptidase activity     |  |
| major histocompatibility complex, class II, DP alpha 1                    | HLA-DPA1           | 575 | 0.05 | immune response                              |  |
| cylindromatosis                                                           | CYLD               | 570 | 0.04 | ubiquitin cycle/ endopeptidase activity      |  |
| DEAD (Asp-Glu-Ala-Asp) box polypeptide 3, Y-linked                        | DDX3Y              | 570 | 0.04 | ---                                          |  |
| chloride intracellular channel 2                                          | CLIC2              | 565 | 0.04 | ion transport                                |  |
| Fc fragment of IgE, high affinity I, receptor for; gamma polypeptide      | FCER1G             | 557 | 0.04 | immune response/receptor activity            |  |
| formyl peptide receptor 1                                                 | FPR1               | 552 | 0.04 | inflammatory response/receptor activity      |  |
| ras-related C3 botulinum toxin substrate 2                                | RAC2               | 541 | 0.04 | intracellular protein transport              |  |
| B-factor, properdin                                                       | BF                 | 530 | 0.04 | immune response/complement binding           |  |
| defensin, alpha 1 /alpha 3                                                | DEFA1 /3           | 525 | 0.04 | defense response                             |  |
| phosphatidylinositol glycan, class A zinc finger CCCH-type containing 12A | PIGA               | 524 | 0.08 | biosynthesis                                 |  |
| v-maf musculoaponeurotic fibrosarcoma oncogene homolog F                  | ZC3H12A            | 521 | 0.04 | ---                                          |  |
| MAFF                                                                      | MAFF               | 511 | 0.04 | transcription                                |  |
| ---                                                                       | ---                | 511 | 0.04 | ---                                          |  |
| baculoviral IAP repeat-containing 3                                       | BIRC3              | 510 | 0.04 | anti-apoptosis/ubiquitin ligase activity     |  |
| cathepsin S                                                               | CTSS               | 488 | 0.04 | immune response/endopeptidase activity       |  |
| microseminoprotein, beta                                                  | MSMB               | 475 | 0.05 | ---                                          |  |
| hemoglobin, beta                                                          | HBB                | 471 | 0.06 | oxygen transport                             |  |
| aquaporin 1                                                               | AQP1               | 470 | 0.10 | water transport                              |  |
| inhibitor of DNA binding 2/ 2B hydroxysteroid (17-beta) dehydrogenase 6   | ID2 /2B            | 468 | 0.07 | regulation of transcription                  |  |
| HSD17B6                                                                   | HSD17B6            | 465 | 0.05 | metabolism/oxidoreductase activity           |  |
| hemoglobin, alpha 1 /alpha 2                                              | HBA1 /2            | 463 | 0.05 | oxygen transport                             |  |
| toll-like receptor 2                                                      | TLR2               | 463 | 0.04 | inflammatory response                        |  |
| Rho family GTPase 1                                                       | RND1               | 459 | 0.04 | regulation of cell adhesion/GTPase activity  |  |
| fibroblast growth factor binding protein 1                                | FGFBP1             | 459 | 0.06 | negative regulation of cell proliferation    |  |
| fatty acid binding protein 4, adipocyte                                   | FABP4              | 442 | 0.05 | transport/ lipid binding                     |  |
| zinc finger protein 165                                                   | ZNF165             | 442 | 0.10 | transcription                                |  |
| interferon-related developmental regulator 1                              | IFRD1              | 438 | 0.05 | cell differentiation                         |  |
| kynureninase                                                              | KYNU               | 436 | 0.05 | nucleotide biosynthesis/peptidase activity   |  |
| SAM domain, SH3 domain and nuclear localisation signals, 1                | SAMSN1             | 429 | 0.05 | ---                                          |  |
| v-maf musculoaponeurotic fibrosarcoma oncogene homolog B                  | MAFB               | 428 | 0.05 | transcription                                |  |
| hexokinase 2                                                              | HK2                | 424 | 0.05 | regulation of progression through cell cycle |  |

|                                                                     |                    |     |      |                                                 |
|---------------------------------------------------------------------|--------------------|-----|------|-------------------------------------------------|
| v-jun sarcoma virus 17 oncogene homolog (avian)                     | JUN                | 412 | 0.05 | transcription                                   |
| CASP8 and FADD-like apoptosis regulator                             | CFLAR              | 406 | 0.05 | proteolysis/signal transducer activity          |
| immunoglobulin heavy locus /G1/G2/G3/mu                             | IGH@/G1 /G2 /G3 /M | 400 | 0.05 | immune response/antigen binding                 |
| CD69 antigen                                                        | CD69               | 386 | 0.05 | defense response/transmembrane receptor         |
| proline rich Gla (G-carboxyglutamic acid) 4                         | PRRG4              | 377 | 0.05 | ---                                             |
| cytochrome P450, family 2, B7 pseudogene 1                          | CYP2B7P1           | 376 | 0.05 | ---                                             |
| transporter 1, ATP-binding cassette B                               | TAP1               | 376 | 0.05 | transport                                       |
| deleted in malignant brain tumors 1                                 | DMBT1              | 368 | 0.05 | innate immune response/scavenger receptor       |
| phorbol-12-myristate-13-acetate-induced protein 1                   | PMAIP1             | 362 | 0.06 | ---                                             |
| complement component 3a receptor 1                                  | C3AR1              | 356 | 0.06 | cellular defense response                       |
| Solute carrier family 30 (zinc transporter), member 1               | SLC30A1            | 352 | 0.06 | transport                                       |
| activity-regulated cytoskeleton-associated protein                  | ARC                | 351 | 0.06 | ---                                             |
| guanylate binding protein 1, interferon-inducible                   | GBP1               | 345 | 0.06 | immune response                                 |
| major histocompatibility complex, class II, DQ beta 1               | HLA-DQB1           | 344 | 0.06 | immune response                                 |
| colony stimulating factor 1 lysozyme / leukocyte                    | CSF1               | 344 | 0.06 | cell proliferation/cytokine activity            |
| immunoglobulin-like receptor, subfamily B1                          | LYZ / LILRB1       | 343 | 0.06 | immune response                                 |
| S100 calcium binding protein A12                                    | S100A12            | 343 | 0.06 | inflammatory response                           |
| guanylate binding protein 2, interferon-inducible                   | GBP2               | 331 | 0.06 | immune response                                 |
| orosomuroid 1 /2                                                    | ORM1 /ORM2         | 325 | 0.06 | inflammatory response                           |
| RRS1 ribosome biogenesis regulator homolog ( <i>S. cerevisiae</i> ) | RRS1               | 322 | 0.06 | ribosome biogenesis                             |
| lymphocyte cytosolic protein 1 (L-plastin)                          | LCP1               | 320 | 0.06 | ---                                             |
| complement component 2                                              | C2                 | 312 | 0.06 | immune response/ endopeptidase activity         |
| thyroid hormone receptor, alpha/nuclear receptor 1D1                | THRA /NR1D1        | 311 | 0.07 | transcription/steroid hormone receptor activity |
| target of myb1-like 1 (chicken)                                     | TOM1L1             | 304 | 0.07 | protein transport                               |
| colony stimulating factor 2 receptor, beta                          | CSF2RB             | 304 | 0.07 | antimicrobial humoral response/receptor         |
| Ras-related GTP binding D chemokine (C-C motif) receptor-like 2     | RRAGD              | 300 | 0.07 | ---                                             |
|                                                                     | CCRL2              | 300 | 0.07 | antimicrobial humoral response/receptor         |
| ceruloplasmin (ferroxidase)                                         | CP                 | 299 | 0.07 | ion transport                                   |
| complement component 4A /4B                                         | C4A /B             | 297 | 0.07 | inflammatory response/endopeptidase inhibitor   |
| tryptophanyl-tRNA synthetase                                        | WARS               | 292 | 0.07 | protein biosynthesis                            |
| orosomuroid 1                                                       | ORM1               | 290 | 0.07 | inflammatory response                           |

|                                                                                                    |             |     |      |                                                |
|----------------------------------------------------------------------------------------------------|-------------|-----|------|------------------------------------------------|
| protein kinase, interferon-inducible dsRNA dependent activator                                     | PRKRA       | 286 | 0.07 | immune response                                |
| proteasome beta t8                                                                                 | PSMB8       | 286 | 0.07 | immune response/endopeptidase activity         |
| pleckstrin                                                                                         | PLEK        | 286 | 0.07 | intracellular signaling cascade/Ca ion binding |
| neurogranin (protein kinase C substrate, RC3)                                                      | NRGN        | 286 | 0.07 | signal transduction                            |
| carcinoembryonic antigen-related cell adhesion molecule 1                                          | CEACAM1     | 280 | 0.07 | homophilic cell adhesion/receptor activity     |
| acid phosphatase 1, soluble                                                                        | ACP1        | 277 | 0.07 | protein aa dephosphorylation                   |
| KIAA0674                                                                                           | KIAA0674    | 276 | 0.07 | protein folding                                |
| mucin 4, tracheobronchial                                                                          | MUC4        | 276 | 0.07 | cell-matrix adhesion                           |
| ankyrin repeat domain 12                                                                           | ANKRD12     | 273 | 0.07 | ---                                            |
| CD163 antigen                                                                                      | CD163       | 272 | 0.08 | antimicrobial humoral response                 |
| tumor necrosis factor, alpha-induced protein 2                                                     | TNFAIP2     | 269 | 0.07 | cell differentiation                           |
| CD44 antigen                                                                                       | CD44        | 268 | 0.07 | cell-matrix adhesion/receptor activity         |
| lymphocyte cytosolic protein 2                                                                     | LCP2        | 263 | 0.07 | immune response                                |
| selectin E (endothelial adhesion molecule 1)                                                       | SELE        | 262 | 0.08 | inflammatory response                          |
| major histocompatibility complex, class II, DQ alpha 1                                             | HLA-DQA1/A2 | 262 | 0.08 | immune response                                |
| ---                                                                                                | ---         | 260 | 0.08 | ---                                            |
| ecotropic viral integration site 2B                                                                | EVI2B       | 259 | 0.08 | ---                                            |
| tripartite motif-containing 29                                                                     | TRIM29      | 257 | 0.08 | transcription                                  |
| trefoil factor 3 (intestinal)                                                                      | TFF3        | 257 | 0.08 | defense response                               |
| peroxisome proliferative activated receptor, delta                                                 | PPARD       | 253 | 0.08 | transcription/steroid hormone receptor         |
| cerebellar degeneration-related protein 2, 62kDa                                                   | CDR2        | 252 | 0.08 | translation                                    |
| spectrin repeat containing, nuclear envelope 1                                                     | SYNE1       | 251 | 0.08 | nuclear organization and biogenesis            |
| mitochondrial ribosomal protein L17                                                                | MRPL17      | 250 | 0.08 | protein biosynthesis                           |
| fibrinogen gamma chain                                                                             | FGG         | 250 | 0.08 | signal transduction                            |
| protein tyrosine phosphatase, receptor type, C                                                     | PTPRC       | 246 | 0.08 | protein aa dephosphorylation                   |
| adenosine A2b receptor                                                                             | ADORA2B     | 244 | 0.08 | cellular defense response                      |
| mitogen-activated protein kinase kinase kinase 8                                                   | MAP3K8      | 240 | 0.08 | protein aa phosphorylation                     |
| major histocompatibility complex, class II, DR beta 4                                              | HLA-DRB4    | 237 | 0.08 | immune response                                |
| TNFAIP3 interacting protein 3                                                                      | TNIP3       | 236 | 0.08 | ---                                            |
| TYRO protein tyrosine kinase binding protein                                                       | TYROBP      | 236 | 0.08 | cellular defense response/receptor signaling   |
| serpin peptidase inhibitor, clade A3 Gardner-Rasheed feline sarcoma viral (v-fgr) oncogene homolog | FGR         | 231 | 0.09 | protein aa phosphorylation                     |
| small trans-membrane and glycosylated protein                                                      | LOC57228    | 230 | 0.09 | ---                                            |
| DNA-damage-inducible transcript 3                                                                  | DDIT3       | 228 | 0.09 | transcription                                  |

|                                                            |          |     |      |                                                |
|------------------------------------------------------------|----------|-----|------|------------------------------------------------|
| homeo box D1                                               | HOXD1    | 224 | 0.09 | regulation of transcription                    |
| proteasome beta10                                          | PSMB10   | 223 | 0.09 | humoral immune response/endopeptidase activity |
| hematopoietic cell-specific Lyn substrate 1                | HCLS1    | 223 | 0.09 | regulation of transcription                    |
| ecotropic viral integration site 2A                        | EVI2A    | 221 | 0.09 | ---                                            |
| apolipoprotein C-I                                         | APOC1    | 220 | 0.09 | lipoprotein metabolism                         |
| v-rel reticuloendotheliosis viral oncogene homolog (avian) | REL      | 217 | 0.09 | transcription                                  |
| sulfotransferase family, cytosolic, 1A 2                   | SULT1A2  | 217 | 0.09 | lipid metabolism                               |
| CD300A antigen                                             | CD300A   | 215 | 0.09 | cell adhesion/receptor activity                |
| hypothetical protein FLJ20152                              | FLJ20152 | 215 | 0.09 | ---                                            |
| deoxyribonuclease II, lysosomal                            | DNASE2   | 213 | 0.09 | DNA metabolism                                 |
| Ubiquitin-conjugating enzyme E2D 2 (UBC4/5 homolog, yeast) | UBE2D2   | 212 | 0.09 | ubiquitin cycle                                |
| nuclear receptor subfamily 4,A1                            | NR4A1    | 211 | 0.09 | transcription                                  |
| mahogunin, ring finger 1                                   | MGRN1    | 211 | 0.09 | protein ubiquitination                         |
| hypothetical protein FLJ20323                              | FLJ20323 | 211 | 0.09 | ---                                            |
| growth arrest and DNA-damage-inducible, gamma              | GADD45G  | 209 | 0.10 | response to stress                             |
| small proline-rich protein 2B                              | SPRR2B   | 209 | 0.10 | epidermis development/structural molecule      |
| chitinase 3-like 1                                         | CHI3L1   | 209 | 0.10 | carbohydrate metabolism/hydrolase activity     |
| aquaporin 3                                                | AQP3     | 206 | 0.10 | transport                                      |
| interferon (alpha, beta and omega) receptor 2              | IFNAR2   | 206 | 0.10 | cell surface receptor signal transduction      |
| ficolin (collagen/fibrinogen domain containing) 3\         | FCN3     | 205 | 0.10 | phosphate transport                            |
| Nuclear receptor coactivator 2                             | NCOA2    | 201 | 0.10 | transcription                                  |
| lectin, galactoside-binding, soluble, 8 (galectin 8)       | LGALS8   | 200 | 0.10 | ---                                            |

Data are mean values for 5 experiments comparing transcript abundance in adult cells with level in fetal cells (**Wade KC, Guttentag SH, Gonzales LW, Maschhoff KL, Gonzales J, Kolla V, Singhal S, and Ballard PL.** Gene Induction during Differentiation of Human Pulmonary Type II Cells In Vitro. *Am J Respir Cell Mol Biol* 34: 727-737, 2006).

---, no gene designation for probe sequence or GO category assigned

**Supplemental Table 3:** Genes expressed >10-fold higher abundance in fetal vs adult type II cells

| <u>Gene Title</u>                                     | <u>Gene Symbol</u> | <u>Abundance (f.u.)</u> |                    |                    | <u>GO Biological Process /Cellular Component</u> |
|-------------------------------------------------------|--------------------|-------------------------|--------------------|--------------------|--------------------------------------------------|
|                                                       |                    | <u>Fetal cells</u>      | <u>Adult cells</u> | <u>Fetal/Adult</u> |                                                  |
| collagen, type IV, alpha 2                            | COL4A2             | 3974                    | 200                | 19.9               | extracell matrix organization/collagen           |
| collagen, type I, alpha 1                             | COL1A1             | 3890                    | 80                 | 48.8               | skeletal development/collagen                    |
| collagen, type I, alpha 2                             | COL1A2             | 3711                    | 46                 | 80.7               | skeletal development/collagen                    |
| collagen, type III, alpha 1                           | COL3A1             | 3454                    | 72                 | 48.0               | phosphate transport /collagen                    |
| insulin-like growth factor binding protein 5          | IGFBP5             | 3401                    | 97                 | 35.2               | regulation cell growth/extracell region          |
| collagen, type IV, alpha 1                            | COL4A1             | 2965                    | 165                | 18.0               | phosphate transport /collagen                    |
| transforming growth factor,                           | TGFBI              | 2935                    | 113                | 26.0               | cell adhesion/extracell matrix                   |
| actin, alpha 2, smooth muscle, aorta                  | ACTA2              | 2357                    | 95                 | 24.8               | muscle development/ cytoskeleton                 |
| chromosome 5 open reading frame 13                    | C5orf13            | 1789                    | 128                | 14.0               | ---                                              |
| serpin peptidase inhibitor (nexin, PAI type 1)        | SERPINE2           | 1717                    | 51                 | 33.6               | cell differentiation/extracell region            |
| secreted protein, acidic, cysteine-rich (osteonectin) | SPARC              | 1478                    | 117                | 12.7               | ossification/extracellular matrix                |
| Cyclin-dependent kinase inhibitor 1C (p57, Kip2)      | CDKN1C             | 1092                    | 75                 | 14.6               | cell cycle/nucleus                               |
| matrix metalloproteinase 2 (gelatinase A,)            | MMP2               | 1078                    | 51                 | 21.2               | peptidoglycan metab/extracell matrix             |
| chondroitin sulfate proteoglycan 2 (versican)         | CSPG2              | 995                     | 46                 | 21.6               | development/extracell matrix                     |
| matrix-remodelling associated 8                       | MXRA8              | 915                     | 41                 | 22.2               | ---                                              |
| collagen, type VI, alpha 1                            | COL6A1             | 865                     | 59                 | 14.8               | phosphate transport /collagen                    |
| peroxidase homolog (Drosophila)                       | PXDN               | 853                     | 67                 | 12.7               | immune response                                  |
| monocyte to macrophage differentiation-associated     | MMD                | 846                     | 71                 | 11.9               | cytolysis/membrane fraction                      |
| myeloid/lymphoid or mixed-lineage leukemia            | MLLT11             | 756                     | 73                 | 10.4               | ---                                              |
| Ca/calmodulin-dependent protein kinase II inhibitor 1 | CAMK2N1            | 708                     | 49                 | 14.3               | ---                                              |
| endothelin receptor type A                            | EDNRA              | 606                     | 56                 | 10.7               | s muscle contraction/plasma membrane             |
| DNA segment on chromosome 4                           | D4S234E            | 478                     | 18                 | 27.3               | dopamine receptor signaling pathway              |
| forkhead box F1                                       | FOXF1              | 387                     | 33                 | 11.6               | transcription/nucleus                            |
| collagen, type XVIII, alpha 1                         | COL18A1            | 365                     | 34                 | 10.8               | phosphate transport /collagen                    |

Data are mean values for 5 experiments comparing transcript abundance in adult cells with level in fetal cells (**Wade KC, Guttentag SH, Gonzales LW, Maschhoff KL, Gonzales J, Kolla V, Singhal S, and Ballard PL**. Gene Induction during Differentiation of Human Pulmonary Type II Cells In Vitro. *Am J Respir Cell Mol Biol* 34: 727-737, 2006).

---, no gene designation for probe sequence or GO category assigned

**Supplemental Table 4.** Genes induced  $\geq 1.5$  fold by hormone treatment

| Gene Title                                                                                                  | DCI-Treated/Control |                 | GO Biological Process                               |
|-------------------------------------------------------------------------------------------------------------|---------------------|-----------------|-----------------------------------------------------|
|                                                                                                             | Gene Symbol         | Mean            |                                                     |
| progastricsin (pepsinogen C)                                                                                | PGC                 | 59.1 $\pm$ 20.6 | proteolysis                                         |
| zinc finger and BTB domain containing 16                                                                    | ZBTB16              | 24.8 $\pm$ 23.8 | transcription                                       |
| dual oxidase 1<br>palate, lung and nasal epithelium carcinoma<br>associated                                 | DUOX1               | 21.8 $\pm$ 13.8 | electron transport/hydrogen peroxide biosynthesis   |
| citron (rho-interacting, serine/threonine kinase<br>21)                                                     | PLUNC               | 20.1 $\pm$ 16.4 | response to pathogenic bacteria                     |
| cartilage acidic protein 1                                                                                  | CIT                 | 10.1 $\pm$ 3.3  | protein phosphorylation/signal transduction         |
| WNT inhibitory factor 1                                                                                     | CRTAC1              | 9.7 $\pm$ 9.4   | cell adhesion /                                     |
| ATP-binding cassette, sub-family A (ABC1),<br>member 3                                                      | WIF1                | 7.4 $\pm$ 4.2   | signal transduction                                 |
| phospholipase A2, group X                                                                                   | ABCA3               | 7.4 $\pm$ 2.5   | transport                                           |
| chemokine (C-C motif) ligand 20                                                                             | PLA2G10             | 6.8 $\pm$ 0.9   | lipid catabolism                                    |
| low density lipoprotein-related protein 2                                                                   | CCL20               | 6.4 $\pm$ 6.7   | chemotaxis/ inflammatory response                   |
| Phosphodiesterase 4D, cAMP-specific<br>N-acetylneuraminase pyruvate lyase<br>(dihydrodipicolinate synthase) | LRP2                | 6.1 $\pm$ 5.3   | protein glycosylation/receptor mediated endocytosis |
| secretory leukocyte peptidase inhibitor                                                                     | PDE4D               | 6.0 $\pm$ 1.4   | signal transduction                                 |
| surfactant protein C                                                                                        | NPL                 | 5.8 $\pm$ 4.3   | carbohydrate metabolic process                      |
| fatty acid synthase                                                                                         | SLPI                | 5.6 $\pm$ 2.5   | anti-inflammatory                                   |
| fatty acid binding protein 5                                                                                | SFTPC               | 5.4 $\pm$ 2.4   | respiratory gaseous exchange                        |
| carbonic anhydrase XII                                                                                      | FASN                | 5.4 $\pm$ 1.1   | fatty acid biosynthesis                             |
| period homolog 1 (Drosophila)                                                                               | FABP5               | 5.3 $\pm$ 4.7   | lipid metabolism                                    |
| hypothetical protein FLJ20366                                                                               | CA12                | 5.3 $\pm$ 3.1   | one-carbon compound metabolism                      |
| alpha-2-glycoprotein 1, zinc                                                                                | PER1                | 5.3 $\pm$ 3.2   | transcription                                       |
| fibrinogen gamma chain<br>transforming, acidic coiled-coil containing<br>protein 2                          | FLJ20366            | 5.0 $\pm$ 1.9   | ---                                                 |
| lysosomal-associated membrane protein 3                                                                     | AZGP1               | 5.0 $\pm$ 2.6   | cell adhesion/cell proliferation/lipid catabolism   |
| lipoprotein lipase                                                                                          | FGG                 | 4.9 $\pm$ 5.8   | signal transduction                                 |
| fatty acid desaturase 1                                                                                     | TACC2               | 4.7 $\pm$ 0.6   | ---                                                 |
| SH3-domain binding protein 5 (BTK-<br>associated)                                                           | LAMP3               | 4.6 $\pm$ 2.4   | cell proliferation/lamellar body membrane           |
| monoamine oxidase A                                                                                         | LPL                 | 4.5 $\pm$ 2.0   | fatty acid metabolism                               |
| phospholipase A2, group IB (pancreas)<br>family with sequence similarity 13, member<br>A1                   | FADS1               | 4.5 $\pm$ 1.1   | fatty acid biosynthesis                             |
| TSC22 domain family, member 3<br>CCAAT/enhancer binding protein (C/EBP),<br>delta                           | SH3BP5              | 4.5 $\pm$ 2.3   | signal transduction                                 |
| N-myc downstream regulated gene 1                                                                           | MAOA                | 4.4 $\pm$ 1.5   | electron transport catecholamine metabolism         |
| Rho-related BTB domain containing 2                                                                         | PLA2G1B             | 4.3 $\pm$ 3.0   | actin filament organization/lipid catabolism        |
| chromosome 14 open reading frame 147                                                                        | FAM13A1             | 4.3 $\pm$ 0.9   | signal transduction                                 |
| uracil-DNA glycosylase 2                                                                                    | TSC22D3             | 4.3 $\pm$ 2.1   | regulation of transcription                         |
|                                                                                                             | CEBPD               | 4.3 $\pm$ 1.9   | \transcription                                      |
|                                                                                                             | NDRG1               | 4.2 $\pm$ 1.7   | response to metal ion                               |
|                                                                                                             | RHOBTB2             | 4.2 $\pm$ 2.8   | small GTPase mediated signal transduction           |
|                                                                                                             | C14orf147           | 4.1 $\pm$ 1.3   | ---                                                 |
|                                                                                                             | UNG2                | 4.1 $\pm$ 3.1   | cell cycle /carbohydrate metabolism                 |

|                                                                      |          |           |                                                         |
|----------------------------------------------------------------------|----------|-----------|---------------------------------------------------------|
| FLJ41131 protein                                                     | FLJ41131 | 4.0 ± 1.2 | ---                                                     |
| solute carrier family 6 (amino acid transporter), member 14          | SLC6A14  | 3.9 ± 0.8 | amino acid metabolism/transport /                       |
| phosphatidylinositol-specific phospholipase C, X domain containing 1 | PLCXD1   | 3.8 ± 1.6 | signal transduction                                     |
| alkaline phosphatase, liver/bone/kidney                              | ALPL     | 3.8 ± 0.9 | ossification/metabolism                                 |
| metallothionein 1G                                                   | MT1G     | 3.6 ± 2.6 | ---                                                     |
| S100 calcium binding protein P                                       | S100P    | 3.6 ± 1.5 | ---                                                     |
| dicarbonyl/L-xylulose reductase                                      | DCXR     | 3.6 ± 1.4 | carbohydrate metabolism                                 |
| A kinase (PRKA) anchor protein 13                                    | AKAP13   | 3.5 ± 1.3 | intracellular signaling cascade                         |
| MID1 interacting protein 1 (gastrulation specific G12-like)          | MID1IP1  | 3.5 ± 1.5 | negative regulation of microtubule depolymerization     |
| hypothetical protein MGC11242                                        | MGC11242 | 3.5 ± 1.6 | ---                                                     |
| regulator of G-protein signalling 16                                 | RGS16    | 3.5 ± 2.1 | negative regulation of signal transduction              |
| GTP binding protein overexpressed in skeletal muscle                 | GEM      | 3.5 ± 1.1 | immune response/signal transduction                     |
| interferon stimulated exonuclease gene 20kDa                         | ISG20    | 3.4 ± 1.8 | cell proliferation                                      |
| ubiquitin specific peptidase 13 (isopeptidase T-3)                   | USP13    | 3.4 ± 1.1 | ubiquitin cycle                                         |
| ---                                                                  | ---      | 3.4 ± 2.8 | ---                                                     |
| ATPase, aminophospholipid transporter Class I, 8A,1                  | ATP8A1   | 3.4 ± 1.3 | cation transport/ metabolism /                          |
| titin                                                                | TTN      | 3.4 ± 2.1 | regulation of actin filament length/muscle development  |
| calcium channel, voltage-dependent, alpha 2/delta subunit 2          | CACNA2D2 | 3.4 ± 1.5 | ---                                                     |
| 5-methyltetrahydrofolate-homocysteine methyltransferase reductase    | MTRR     | 3.3 ± 1.3 | electron transport/amino acid biosynthesis              |
| arachidonate 15-lipoxygenase, second type                            | ALOX15B  | 3.3 ± 1.6 | lipid metabolism /negative regulation of growth /       |
| proprotein convertase subtilisin/kexin type 2                        | PCSK2    | 3.3 ± 1.1 | proteolysis/cell-cell signaling                         |
| sushi, nidogen and EGF-like domains 1                                | SNED1    | 3.3 ± 1.2 | cell-matrix adhesion                                    |
| selenium binding protein 1                                           | SELENBP1 | 3.2 ± 2.0 | ---                                                     |
| serum/glucocorticoid regulated kinase                                | SGK      | 3.2 ± 1.8 | protein amino acid phosphorylation/sodium ion transport |
| protocadherin 9                                                      | PCDH9    | 3.2 ± 1.2 | cell adhesion                                           |
| GTP cyclohydrolase I feedback regulator                              | GCHFR    | 3.2 ± 1.2 | nitric oxide biosynthesis                               |
| transcription factor CP2-like 1                                      | TFCP2L1  | 3.2 ± 1.0 | regulation of transcription                             |
| colony stimulating factor 3 receptor                                 | CSF3R    | 3.1 ± 0.8 | defense response /cell adhesion                         |
| methylenetetrahydrofolate dehydrogenase (NADP+ dept) 2-like          | MTHFD2L  | 3.1 ± 0.9 | folic acid and derivative biosynthesis                  |
| phosphatidylinositol glycan, class A                                 | PIGA     | 3.1 ± 1.0 | biosynthesis                                            |
| nicotinamide N-methyltransferase                                     | NNMT     | 3.1 ± 2.1 | ---                                                     |
| v-ets erythroblastosis virus E26 oncogene homolog 2 (avian)          | ETS2     | 3.0 ± 0.8 | regulation of transcription                             |
| metallothionein 1M                                                   | MT1M     | 3.0 ± 2.5 | ---                                                     |
| ---                                                                  | ---      | 3.0 ± 1.2 | ---                                                     |
| dehydrogenase/reductase (SDR family) member 3                        | DHRS3    | 3.0 ± 1.2 | fatty acid metabolism                                   |
| ribonuclease, RNase A family, 4                                      | RNASE4   | 3.0 ± 0.9 | mRNA cleavage/development                               |
| rabphilin 3A-like (without C2 domains)                               | RPH3AL   | 3.0 ± 0.8 | intracellular protein transport                         |
| protein kinase C, alpha                                              | PRKCA    | 3.0 ± 2.2 | cell cycle /intracellular signaling cascade             |
| sphingomyelin phosphodiesterase, acid-like                           | SMPDL3A  | 3.0 ± 1.2 | carbohydrate metabolism                                 |

3A

|                                                                  |               |           |                                                       |
|------------------------------------------------------------------|---------------|-----------|-------------------------------------------------------|
| surfactant protein B                                             | SFTPB         | 2.9 ± 1.3 | respiratory gaseous exchange                          |
| calpain 3, (p94)                                                 | CAPN3         | 2.9 ± 1.3 | proteolysis                                           |
| regulator of G-protein signalling 2, 24kDa                       | RGS2          | 2.9 ± 1.0 | cell cycle/negative regulation of signal transduction |
| DKFZP564O0823 protein                                            | DKFZP564O0823 | 2.8 ± 0.3 | ---                                                   |
| FN5 protein                                                      | FN5           | 2.8 ± 0.5 | ---                                                   |
| serine hydroxymethyltransferase 1 (soluble)                      | SHMT1         | 2.8 ± 2.0 | one-carbon compound metabolism                        |
| metallothionein 1H                                               | MT1H          | 2.8 ± 1.5 | ---                                                   |
| Hypothetical protein FLJ11127                                    | FLJ11127      | 2.8 ± 1.3 | ---                                                   |
| HIRA interacting protein 3                                       | HIRIP3        | 2.8 ± 1.6 | chromatin assembly or disassembly                     |
| flavin containing monooxygenase 5                                | FMO5          | 2.8 ± 1.8 | protein folding                                       |
| cystathionase (cystathionine gamma-lyase)                        | CTH           | 2.8 ± 1.1 | amino acid biosynthesis                               |
| KIAA0703 gene product                                            | KIAA0703      | 2.7 ± 0.7 | cation transport                                      |
| melanophilin                                                     | MLPH          | 2.7 ± 0.3 | intracellular protein transport                       |
| Similar to 60S ribosomal protein L35                             | RPL35         | 2.7 ± 1.6 | protein biosynthesis                                  |
| protein kinase C binding protein 1                               | PRKCBP1       | 2.7 ± 0.4 | regulation of transcription                           |
| Kruppel-like factor 9                                            | KLF9          | 2.7 ± 0.8 | regulation of transcription,                          |
| ceruloplasmin (ferroxidase)                                      | CP            | 2.7 ± 1.1 | ion transport                                         |
| aldehyde dehydrogenase 6 A1                                      | ALDH6A1       | 2.7 ± 1.0 | metabolism                                            |
| serpin peptidase inhibitor, 1                                    | SERPINF1      | 2.7 ± 1.3 | development/cell proliferation                        |
| endothelial PAS domain protein 1                                 | EPAS1         | 2.6 ± 0.7 | cell differentiation /angiogenesis                    |
| dihydropyrimidine dehydrogenase                                  | DPYD          | 2.6 ± 1.1 | thymidine catabolism                                  |
| KIAA0256 gene product                                            | KIAA0256      | 2.6 ± 0.8 | ---                                                   |
| potassium inwardly-rectifying channel, J, 8                      | KCNJ8         | 2.6 ± 0.9 | ion transport                                         |
| chromosome 1 open reading frame 121                              | C1orf121      | 2.6 ± 0.4 | ---                                                   |
| chitinase 3-like 1 (cartilage glycoprotein-39)                   | CHI3L1        | 2.6 ± 1.0 | carbohydrate metabolism                               |
| methylcrotonoyl-Coenzyme A carboxylase 1 (alpha)                 | MCCC1         | 2.6 ± 1.0 | leucine catabolism                                    |
| complement component 2                                           | C2            | 2.5 ± 1.0 | immune response/proteolysis                           |
| DEP domain containing 6                                          | DEPDC6        | 2.5 ± 0.7 | intracellular signaling cascade                       |
| cytochrome P450, family 1, A1                                    | CYP1A1        | 2.5 ± 0.8 | electron transport                                    |
| metallothionein 1F (functional)                                  | MT1F          | 2.5 ± 1.1 | ---                                                   |
| MRNA; cDNA DKFZp762M127 (from clone DKFZp762M127)                | ---           | 2.5 ± 0.4 | ---                                                   |
| Transcribed locus, weakly similar to XP_496299                   | ---           | 2.5 ± 0.7 | ---                                                   |
| glutathione S-transferase A4                                     | GSTA4         | 2.5 ± 0.9 | response to stress/metabolism                         |
| Mitochondrial ribosomal protein S6                               | MRPS6         | 2.4 ± 1.1 | protein biosynthesis                                  |
| metallothionein 1X                                               | MT1X          | 2.4 ± 1.2 | response to metal ion/electron transport              |
| patched homolog (Drosophila)                                     | PTCH          | 2.4 ± 0.7 | cell cycle/signal transduction                        |
| solute carrier family 24 (sodium/potassium/calcium exchanger), 3 | SLC24A3       | 2.4 ± 1.3 | ion transport                                         |
| dynamin 2                                                        | DNM2          | 2.4 ± 0.5 | mitotic cell cycle/regulation of transcription        |
| solute carrier family 27 (fatty acid transporter), member 3      | SLC27A3       | 2.4 ± 0.7 | lipid metabolism                                      |
| surfactant protein D                                             | SFTPD         | 2.4 ± 1.0 | regulation of cytokine/macrophage chemotaxis          |

|                                                                                                      |              |           |                                                        |
|------------------------------------------------------------------------------------------------------|--------------|-----------|--------------------------------------------------------|
| ---                                                                                                  | ---          | 2.4 ± 1.1 | ---                                                    |
| tensin like C1 domain containing phosphatase (tensin 2)                                              | TENC1        | 2.4 ± 1.1 | intracellular signaling cascade                        |
| solute carrier family 5 (inositol transporters), 3                                                   | SLC5A3       | 2.4 ± 1.0 | ion transport                                          |
| Hypothetical LOC388388                                                                               | ---          | 2.4 ± 1.0 | ---                                                    |
| response gene to complement 32                                                                       | RGC32        | 2.4 ± 0.8 | regulation of cyclin dependent protein kinase activity |
| suppression of tumorigenicity 7                                                                      | ST7          | 2.4 ± 0.9 | ---                                                    |
| phosphodiesterase 4B, cAMP-specific                                                                  | PDE4B        | 2.4 ± 0.5 | signal transduction                                    |
| high-mobility group box 2                                                                            | HMGB2        | 2.4 ± 0.5 | DNA replication/regulation of transcription            |
| family with sequence similarity 46, member A                                                         | FAM46A       | 2.4 ± 1.0 | ---                                                    |
| inhibin, beta B (activin AB beta polypeptide)                                                        | INHBB        | 2.3 ± 0.7 | response to external stimulus/cell differentiation     |
| insulin-like growth factor binding protein 5                                                         | IGFBP5       | 2.3 ± 0.6 | regulation of cell growth                              |
| aldo-keto reductase 1, C1                                                                            | AKR1C1/C2    | 2.3 ± 0.5 | lipid metabolism/transport                             |
| death-associated protein kinase 2                                                                    | DAPK2        | 2.3 ± 0.9 | protein aa phosphorylation/induction apoptosis         |
| ribosomal protein S6 kinase, 90kDa, polypeptide 2                                                    | RPS6KA2      | 2.3 ± 0.4 | protein aa phosphorylation/signal transduction         |
| NFK light polypeptide gene enhancer in B-cells inhibitor, a                                          | NFKBIA       | 2.3 ± 0.5 | apoptosis/response to pathogenic bacteria              |
| 3-hydroxy-3-methylglutaryl-Coenzyme A synthase 1 (soluble)                                           | HMGCS1       | 2.3 ± 0.8 | lipid biosynthesis                                     |
| interferon induced transmembrane protein 1 (9-27)                                                    | IFITM1       | 2.3 ± 1.2 | immune response/cell proliferation                     |
| B-cell CLL/lymphoma 6 (zinc finger protein 51)                                                       | BCL6         | 2.3 ± 0.8 | inflammatory response/transcription                    |
| inositol 1,4,5-triphosphate receptor, type 2                                                         | ITPR2        | 2.3 ± 0.6 | cation transport                                       |
| syntrophin, beta 1                                                                                   | SNTB1        | 2.3 ± 1.0 | muscle contraction                                     |
| nuclear receptor subfamily 4, A, 2                                                                   | NR4A2        | 2.3 ± 0.7 | transcription                                          |
| glycoprotein M6B                                                                                     | GPM6B        | 2.3 ± 1.4 | development                                            |
| adipose differentiation-related protein                                                              | ADFP         | 2.3 ± 1.0 | ---                                                    |
| high-mobility group box 3                                                                            | HMGB3        | 2.3 ± 1.0 | development/regulation of transcription,               |
| DKFZP434C171 protein                                                                                 | DKFZP434C171 | 2.2 ± 0.6 | ---                                                    |
| glycerol-3-phosphate dehydrogenase 1-like sodium channel, nonvoltage-gated 1, beta (Liddle syndrome) | GPD1L        | 2.2 ± 0.4 | carbohydrate metabolism                                |
| cell division cycle 25B                                                                              | SCNN1B       | 2.2 ± 0.6 | ion transport                                          |
| Rap guanine nucleotide exchange factor (GEF) 5                                                       | CDC25B       | 2.2 ± 0.5 | cell division                                          |
| CCR4-NOT transcription complex, subunit 8                                                            | RAPGEF5      | 2.2 ± 1.0 | transcription                                          |
| CNOT8                                                                                                | CNOT8        | 2.2 ± 0.9 | transcription                                          |
| cytochrome P450, 2, B, 7, 1                                                                          | CYP2B7P1     | 2.2 ± 0.7 | ---                                                    |
| peroxisomal membrane protein 4, 24kDa                                                                | PXMP4        | 2.2 ± 0.9 | ---                                                    |
| ST6                                                                                                  | ST6GALNAC4   | 2.2 ± 0.6 | protein amino acid glycosylation                       |
| ATPase, Na <sup>+</sup> /K <sup>+</sup> transporting, alpha 1 polypeptide                            | ATP1A1       | 2.2 ± 0.3 | cation transport                                       |
| acyl-Coenzyme A dehydrogenase, long chain                                                            | ACADL        | 2.2 ± 0.7 | lipid metabolism                                       |
| isopentenyl-diphosphate delta isomerase 1                                                            | IDI1         | 2.2 ± 0.4 | lipid biosynthesis                                     |
| lanosterol synthase (2,3-oxidosqualene-lanosterol cyclase)                                           | LSS          | 2.2 ± 0.8 | lipid biosynthesis                                     |
| prostate stem cell antigen                                                                           | PSCA         | 2.2 ± 0.7 | ---                                                    |
| solute carrier family 7, 8                                                                           | SLC7A8       | 2.2 ± 0.6 | amino acid transport                                   |

|                                                                    |               |           |                                                    |
|--------------------------------------------------------------------|---------------|-----------|----------------------------------------------------|
| dolichyl-phosphate mannosyltransferase polypeptide 3               | DPM3          | 2.2 ± 0.2 | carbohydrate metabolism                            |
| solute carrier organic anion transporter family, member 4C1        | SLCO4C1       | 2.2 ± 0.4 | transport                                          |
| MOCO sulphurase C-terminal domain containing 1                     | MOSC1         | 2.2 ± 0.8 | ---                                                |
| CCAAT/enhancer binding protein (C/EBP), beta                       | CEBPB         | 2.2 ± 0.3 | inflammatory response/transcription                |
| insulin induced gene 1                                             | INSIG1        | 2.1 ± 0.7 | metabolism/cell proliferation                      |
| ATP-binding cassette, sub-family C (CFTR/MRP), member 4            | ABCC4         | 2.1 ± 0.8 | ion transport                                      |
| arginase, type II                                                  | ARG2          | 2.1 ± 0.4 | urea cycle/nitric oxide biosynthesis               |
| egl nine homolog 2 (C. elegans)                                    | EGLN2         | 2.1 ± 0.6 | regulation of cell growth /protein metabolism      |
| 3'-phosphoadenosine 5'-phosphosulfate synthase 2                   | PAPSS2        | 2.1 ± 0.7 | nucleoside, nucleotide and nucleic acid metabolism |
| Poly(rC) binding protein 2                                         | PCBP2         | 2.1 ± 0.7 | mRNA metabolism                                    |
| Metallothionein 1M                                                 | MT1K          | 2.1 ± 0.7 | ---                                                |
| aldehyde dehydrogenase 3 family, member B1                         | ALDH3B1       | 2.1 ± 0.7 | alcohol metabolism/lipid metabolism                |
| hypothetical protein DKFZp434C0328                                 | DKFZp434C0328 | 2.1 ± 0.8 | ---                                                |
| neural precursor cell expressed, development down-regulated 4-like | NEDD4L        | 2.1 ± 0.8 | sodium ion transport/protein modification          |
| EF-hand calcium binding domain 2                                   | EFCAB2        | 2.1 ± 1.0 | ---                                                |
| interleukin 6 receptor                                             | IL6R          | 2.1 ± 0.4 | immune response/development                        |
| choline phosphotransferase 1                                       | CHPT1         | 2.1 ± 0.6 | regulation of cell growth/lipid metabolism         |
| myosin regulatory light chain interacting protein                  | MYLIP         | 2.1 ± 0.7 | cell motility/ubiquitin cycle                      |
| metallothionein 2A                                                 | MT2A          | 2.0 ± 0.9 | copper ion homeostasis                             |
| kinesin family member 13B                                          | KIF13B        | 2.0 ± 0.8 | protein targeting/ microtubule-based movement      |
| uronyl-2-sulfotransferase                                          | UST           | 2.0 ± 0.5 | protein amino acid sulfation                       |
| stearoyl-CoA desaturase (delta-9-desaturase)                       | SCD           | 2.0 ± 0.6 | fatty acid biosynthesis                            |
| sodium channel, nonvoltage-gated 1 alpha                           | SCNN1A        | 2.0 ± 0.4 | ion transport                                      |
| LETM1 domain containing 1                                          | LETMD1        | 2.0 ± 0.3 | ---                                                |
| apoptosis-inducing, TAF9-like domain 1                             | APITD1        | 2.0 ± 0.6 | ---                                                |
| epoxide hydrolase 1, microsomal (xenobiotic)                       | EPHX1         | 2.0 ± 0.4 | xenobiotic metabolism                              |
| fibroblast growth factor receptor 2                                | FGFR2         | 2.0 ± 0.4 | protein amino acid phosphorylation                 |
| N-acetylneuraminic acid synthase (sialic acid synthase)            | NANS          | 2.0 ± 0.2 | carbohydrate biosynthesis                          |
| DKFZP564J102 protein                                               | DKFZP564J102  | 2.0 ± 0.3 | ---                                                |
| DKFZP586A0522 protein                                              | DKFZP586A0522 | 2.0 ± 0.6 | ---                                                |
| acetyl-Coenzyme A acetyltransferase 1                              | ACAT1         | 2.0 ± 0.5 | ---                                                |
| chaperone, ABC1 activity of bc1 complex like (S. pombe)            | CABC1         | 2.0 ± 0.7 | protein folding                                    |
| acetyl-Coenzyme A carboxylase alpha                                | ACACA         | 2.0 ± 0.3 | fatty acid biosynthesis                            |
| chromosome 1 open reading frame 25                                 | C1orf25       | 2.0 ± 0.7 | tRNA processing                                    |
| cellular repressor of E1A-stimulated genes 1                       | CREG1         | 2.0 ± 0.1 | regulation of cell growth/transcription            |
| protein tyrosine phosphatase type IVA, member 1                    | PTP4A1        | 2.0 ± 0.4 | protein aa dephosphorylation/development           |
| KIAA1280 protein                                                   | KIAA1280      | 2.0 ± 0.4 | ---                                                |
| phosphomannomutase 1                                               | PMM1          | 1.9 ± 0.4 | metabolism                                         |
| phosphatidylinositol-4-phosphate 5-kinase,                         | PIP5K1B       | 1.9 ± 0.4 | ---                                                |

type I, beta

|                                                               |          |           |                                                         |
|---------------------------------------------------------------|----------|-----------|---------------------------------------------------------|
| brain protein 44-like                                         | BRP44L   | 1.9 ± 0.4 | ---                                                     |
| unc-13 homolog B (C. elegans)                                 | UNC13B   | 1.9 ± 0.6 | exocytosis/induction of apoptosis                       |
| PDZ domain containing 3                                       | PDZK3    | 1.9 ± 0.7 | cell adhesion                                           |
| chromosome 5 open reading frame 4                             | C5orf4   | 1.9 ± 0.4 | metabolism                                              |
| CD44 antigen                                                  | CD44     | 1.9 ± 0.7 | cell-matrix                                             |
| polymerase (RNA) I polypeptide D, 16kDa                       | POLR1D   | 1.9 ± 0.2 | transcription                                           |
| ER degradation enhancer, mannosidase alpha-like 1             | EDEM1    | 1.9 ± 0.7 | protein amino acid N-linked glycosylation               |
| hydroxysteroid (17-beta) dehydrogenase 4                      | HSD17B4  | 1.9 ± 0.3 | lipid metabolism                                        |
| propionyl Coenzyme A carboxylase, alpha polypeptide           | PCCA     | 1.9 ± 0.5 | fatty acid metabolism                                   |
| chromosome 6 open reading frame 48                            | C6orf48  | 1.9 ± 0.2 | ---                                                     |
| ubiquitin domain containing 1                                 | UBTD1    | 1.9 ± 0.6 | protein modification                                    |
| heat-responsive protein 12                                    | HRSP12   | 1.9 ± 0.3 | regulation of translational termination                 |
| chromosome 14 open reading frame 94                           | C14orf94 | 1.9 ± 0.7 | ---                                                     |
| mal, T-cell differentiation protein-like                      | MALL     | 1.9 ± 0.3 | cholesterol homeostasis                                 |
| syntaxin binding protein 1                                    | STXBP1   | 1.9 ± 0.5 | vesicle-mediated transport                              |
| programmed cell death 4 (neoplastic transformation inhibitor) | PDCD4    | 1.9 ± 0.5 | ---                                                     |
| two pore segment channel 1                                    | TPCN1    | 1.9 ± 0.6 | ion transport                                           |
| anterior gradient 2 homolog (Xenopus laevis)                  | AGR2     | 1.9 ± 0.1 | ---                                                     |
| X-box binding protein 1                                       | XPB1     | 1.9 ± 0.3 | immune response/transcription                           |
| FXYD domain containing ion transport regulator 3              | FXYD3    | 1.9 ± 0.5 | ion transport                                           |
| ATP-binding cassette, sub-family C (CFTR/MRP), member 6       | ABCC6    | 1.9 ± 0.5 | transport                                               |
| protein kinase, AMP-activated, beta 1 non-catalytic subunit   | PRKAB1   | 1.9 ± 0.3 | carbohydrate metabolism/lipid biosynthesis              |
| nucleosome assembly protein 1-like 1                          | NAP1L1   | 1.9 ± 0.4 | DNA replication                                         |
| adenylate kinase 1                                            | AK1      | 1.9 ± 0.2 | nucleoside, nucleotide and nucleic acid metabolism      |
| endonuclease G                                                | ENDOG    | 1.9 ± 0.6 | DNA metabolism                                          |
| WD repeat domain 19                                           | WDR19    | 1.9 ± 0.3 | ---                                                     |
| surfactant protein A2                                         | SFTPA2   | 1.9 ± 0.7 | respiratory gaseous exchange                            |
| RNA binding protein with multiple splicing                    | RBPMS    | 1.9 ± 0.4 | RNA processing                                          |
| ribonuclease, RNase A family, 1 (pancreatic)                  | RNASE1   | 1.8 ± 0.9 | ---                                                     |
| ribosomal protein S6 kinase, 90kDa, polypeptide 5             | RPS6KA5  | 1.8 ± 0.5 | transcription./protein amino acid phosphorylation       |
| arginine vasopressin-induced 1                                | AVP11    | 1.8 ± 0.4 | ---                                                     |
| chromosome 6 open reading frame 60                            | C6orf60  | 1.8 ± 0.4 | ---                                                     |
| 24-dehydrocholesterol reductase                               | DHCR24   | 1.8 ± 0.3 | lipid biosynthesis                                      |
| protein tyrosine phosphatase type IVA, member 2               | PTP4A2   | 1.8 ± 0.6 | protein amino acid dephosphorylation                    |
| Down syndrome critical region gene 5                          | DSCR5    | 1.8 ± 0.5 | ---                                                     |
| 7-dehydrocholesterol reductase                                | DHCR7    | 1.8 ± 0.2 | lipid biosynthesis                                      |
| hypothetical protein FLJ23560                                 | FLJ23560 | 1.8 ± 0.8 | protein folding                                         |
| insulin receptor                                              | INSR     | 1.8 ± 0.3 | carbohydrate metabolism                                 |
| B-cell translocation gene 1, anti-proliferative               | BTG1     | 1.8 ± 0.4 | negative regulation of cell proliferation/transcription |

|                                                                    |           |           |                                                   |
|--------------------------------------------------------------------|-----------|-----------|---------------------------------------------------|
| succinate-CoA ligase, GDP-forming, beta subunit                    | SUCLG2    | 1.8 ± 0.4 | tricarboxylic acid cycle                          |
| BTG family, member 3                                               | BTG3      | 1.8 ± 0.2 | regulation of progression through cell cycle      |
| Mannosidase, alpha, class 1A, member 1                             | MAN1A1    | 1.8 ± 0.8 | carbohydrate metabolism                           |
| branched chain aminotransferase 2, mitochondrial                   | BCAT2     | 1.8 ± 0.4 | metabolism/amino acid biosynthesis                |
| sorting nexin 1                                                    | SNX1      | 1.8 ± 0.5 | intracellular protein transport                   |
| sin3-associated polypeptide, 18kDa                                 | SAP18     | 1.8 ± 0.3 | transcription                                     |
| WAP four-disulfide core domain 2                                   | WFDC2     | 1.8 ± 0.2 | proteolysis                                       |
| REST corepressor 1                                                 | RCOR1     | 1.8 ± 0.2 | regulation of transcription                       |
| Sec23 homolog B ( <i>S. cerevisiae</i> )                           | SEC23B    | 1.8 ± 0.4 | intracellular protein transport                   |
| solute carrier family 1 (neutral amino acid transporter), member 5 | SLC1A5    | 1.8 ± 0.2 | transport                                         |
| nebulette                                                          | NEBL      | 1.8 ± 0.3 | regulation of actin filament length               |
| p10-binding protein                                                | Cep70     | 1.8 ± 0.4 | ---                                               |
| La ribonucleoprotein domain family, member 5                       | LARP5     | 1.8 ± 0.5 | ---                                               |
| P450 (cytochrome) oxidoreductase                                   | POR       | 1.8 ± 0.2 | electron transport                                |
| cystathionine-beta-synthase                                        | CBS       | 1.8 ± 0.5 | amino acid biosynthesis                           |
| ring finger protein 128                                            | RNF128    | 1.8 ± 0.3 | proteolysis/protein ubiquitination                |
| solute carrier family 7, 11                                        | SLC7A11   | 1.8 ± 0.3 | transport                                         |
| enthoprotin                                                        | ENTH      | 1.7 ± 0.4 | endocytosis                                       |
| metallothionein 1E (functional)                                    | MT1E      | 1.7 ± 0.4 | ---                                               |
| insulin receptor substrate 2                                       | IRS2      | 1.7 ± 0.3 | glucose metabolism/cell proliferation             |
| biliverdin reductase B (flavin reductase (NADPH))                  | BLVRB     | 1.7 ± 0.5 | nucleotide-sugar metabolism                       |
| selenoprotein P, plasma, 1                                         | SEPP1     | 1.7 ± 0.3 | response to oxidative stress                      |
| hypothetical protein LOC339229                                     | LOC339229 | 1.7 ± 0.1 | ---                                               |
| signal transducer and activator of transcription 3                 | STAT3     | 1.7 ± 0.3 | acute-phase response/regulation of transcription, |
| transcription factor-like 5 (basic helix-loop-helix)               | TCFL5     | 1.7 ± 0.5 | regulation of transcription,/development          |
| cAMP responsive element binding protein-like 2                     | CREBL2    | 1.7 ± 0.2 | regulation of transcription,                      |
| par-3 partitioning defective 3 homolog ( <i>C. elegans</i> )       | PARD3     | 1.7 ± 0.6 | cell division/protein complex assembly            |
| serpin peptidase inhibitor, clade A, 1                             | SERPINA1  | 1.7 ± 0.3 | acute-phase response                              |
| lipin 2                                                            | LPIN2     | 1.7 ± 0.4 | ---                                               |
| H3 histone, family 3B (H3.3B)                                      | H3F3B     | 1.7 ± 0.3 | nucleosome assembly                               |
| enolase superfamily member 1                                       | ENOSF1    | 1.7 ± 0.4 | metabolism                                        |
| lipoma HMGIC fusion partner-like 2                                 | LHFPL2    | 1.7 ± 0.3 | ---                                               |
| Coenzyme A synthase                                                | COASY     | 1.7 ± 0.4 | biosynthesis                                      |
| sema, immunoglobulin, short basic domain, secreted, semaphorin 3B  | SEMA3B    | 1.7 ± 0.6 | cell-cell signaling/development                   |
| lipin 1                                                            | LPIN1     | 1.7 ± 0.5 | fat cell differentiation                          |
| cAMP responsive element binding protein 3-like 1                   | CREB3L1   | 1.7 ± 0.4 | regulation of transcription                       |
| lysophosphatidic acid acyltransferase, beta                        | AGPAT2    | 1.7 ± 0.4 | phospholipid biosynthesis                         |
| VAMP (vesicle-associated membrane protein)-associated protein A    | VAPA      | 1.7 ± 0.1 | exocytosis                                        |

|                                                                    |                 |           |                                                  |
|--------------------------------------------------------------------|-----------------|-----------|--------------------------------------------------|
| transmembrane protein 80                                           | TMEM80          | 1.7 ± 0.5 | ---                                              |
| emopamil binding protein (sterol isomerase)                        | EBP             | 1.7 ± 0.1 | lipid biosynthesis                               |
| glutamate-ammonia ligase (glutamine synthetase)                    | GLUL            | 1.7 ± 0.1 | nitrogen compound metabolism                     |
| KIAA1102 protein                                                   | KIAA1102        | 1.7 ± 0.3 | actomyosin structure organization and biogenesis |
| ecotropic viral integration site 1                                 | EV11            | 1.7 ± 0.4 | development                                      |
| intersectin 2                                                      | ITSN2           | 1.7 ± 0.2 | endocytosis                                      |
| superoxide dismutase 3, extracellular                              | SOD3            | 1.7 ± 0.3 | superoxide metabolism                            |
| Methionine adenosyltransferase II, alpha                           | MAT2A           | 1.7 ± 0.5 | one-carbon compound metabolism                   |
| autism susceptibility candidate 2                                  | AUTS2           | 1.7 ± 0.3 | ---                                              |
| forkhead box O1A (rhabdomyosarcoma)                                | FOXO1A          | 1.7 ± 0.7 | transcription                                    |
| zinc finger protein 42 (myeloid-specific retinoic acid-responsive) | ZNF42           | 1.7 ± 0.3 | transcription                                    |
| calcium binding protein P22                                        | CHP             | 1.7 ± 0.1 | potassium ion transport                          |
| mitochondrial ribosomal protein S18B                               | MRPS18B         | 1.7 ± 0.4 | protein biosynthesis                             |
| phosphoinositide-3-kinase, catalytic, beta polypeptide             | PIK3CB          | 1.6 ± 0.3 | regulation of cell cycle/chemotaxis              |
| frequently rearranged in advanced T-cell lymphomas 2               | FRAT2           | 1.6 ± 0.4 | cell proliferation/development                   |
| LIM domain only 3 (rhombotin-like 2)                               | LMO3            | 1.6 ± 0.3 | transcription                                    |
| zinc finger protein 36, C3H type, homolog (mouse)                  | ZFP36           | 1.6 ± 0.2 | mRNA catabolism                                  |
| hypothetical protein FLJ11259                                      | FLJ11259        | 1.6 ± 0.1 | ---                                              |
| Bernardinelli-Seip congenital lipodystrophy 2 (seipin)             | BSCL2 / HNRPUL2 | 1.6 ± 0.4 | ---                                              |
| laminin, beta 2 (laminin S)                                        | LAMB2           | 1.6 ± 0.5 | cell adhesion                                    |
| pleckstrin homology domain containing, B (evectins) 1              | PLEKHB1         | 1.6 ± 0.3 | phototransduction                                |
| SNF1-like kinase                                                   | SNF1LK          | 1.6 ± 0.7 | cell cycle/development                           |
| chromosome 10 open reading frame 77                                | C10orf77        | 1.6 ± 0.5 | ---                                              |
| sterol-C4-methyl oxidase-like                                      | SC4MOL          | 1.6 ± 0.1 | lipid biosynthesis                               |
| THAP domain containing 11                                          | THAP11          | 1.6 ± 0.3 | ---                                              |
| hyaluronoglucosaminidase 1                                         | HYAL1           | 1.6 ± 0.3 | carbohydrate metabolism                          |
| solute carrier family 19 (thiamine transporter), member 2          | SLC19A2         | 1.6 ± 0.1 | transport                                        |
| chromosome 14 open reading frame 109                               | C14orf109       | 1.6 ± 0.2 | ---                                              |
| Similar to lymphocyte-specific protein 1                           | ---             | 1.6 ± 0.3 | ---                                              |
| hypothetical protein MAC30                                         | MAC30           | 1.6 ± 0.3 | regulation of cell growth                        |
| syntaxin 12                                                        | STX12           | 1.6 ± 0.3 | intracellular protein transport                  |
| low density lipoprotein receptor (familial hypercholesterolemia)   | LDLR            | 1.6 ± 0.1 | lipid transport                                  |
| MOCO sulphurase C-terminal domain containing 2                     | MOSC2           | 1.6 ± 0.3 | ---                                              |
| GULP, engulfment adaptor PTB domain containing 1                   | GULP1           | 1.6 ± 0.2 | phagocytosis,                                    |
| dual specificity phosphatase 1                                     | DUSP1           | 1.6 ± 0.3 | protein aa dephosphorylation/cell cycle          |
| MAX-like protein X                                                 | MLX             | 1.6 ± 0.4 | transcription                                    |
| aldo-keto reductase 1, C2                                          | AKR1C2          | 1.6 ± 0.3 | lipid metabolism                                 |
| IMP (inosine monophosphate) dehydrogenase2                         | IMPDH2          | 1.5 ± 0.2 | purine nucleotide biosynthesis                   |

|                                                            |         |           |                                       |
|------------------------------------------------------------|---------|-----------|---------------------------------------|
| CD59 antigen p18-20                                        | CD59    | 1.5 ± 0.2 | immune response                       |
| ornithine aminotransferase (gyrate atrophy)                | OAT     | 1.5 ± 0.5 | amino acid metabolism                 |
| poly(A)-specific ribonuclease (deadenylation nuclease)     | PARN    | 1.5 ± 0.2 | transcription/mRNA catabolism         |
| CD97 antigen                                               | CD97    | 1.5 ± 0.4 | inflammatory response/cell motility   |
| UDP-GlcNAc:bGal beta-1,3-N-acetylglucosaminyltransferase 6 | B3GNT6  | 1.5 ± 0.2 | poly-N-acetyllactosamine biosynthesis |
| kallikrein 11                                              | KLK11   | 1.5 ± 0.6 | proteolysis                           |
| phosphodiesterase 4D interacting protein (myomegalin)      | PDE4DIP | 1.5 ± 0.5 | protein biosynthesis                  |
| RING1 and YY1 binding protein                              | RYBP    | 1.5 ± 0.1 | transcription /apoptosis              |

Data are mean±SD for 5 experiments comparing transcript abundance after 5 days culture without (control) or with (treated) dexamethasone+8-Br-cAMP+isobuthylmethylxanthine  
---, no gene designation for probe sequence or GO category assigned
